# Supplementary material for: Transcription shapes genome-wide histone acetylation patterns
Source: PubMed Central journal article supplement (PMC7801501; doi:10.1038/s41467-020-20543-z), 2021-01-11
Supplement: 41467_2020_20543_MOESM3_ESM.pdf [file 41467_2020_20543_MOESM3_ESM.pdf]

## Reporting Summary

Nature Research wishes to improve the reproducibility of the work that we publish. This form provides structure for consistency and transparency in reporting. For further information on Nature Research policies, see [Authors & Referees](#) and the [Editorial Policy Checklist](#).

### Statistics

For all statistical analyses, confirm that the following items are present in the figure legend, table legend, main text, or Methods section.

n/a Confirmed

- The exact sample size ( $n$ ) for each experimental group/condition, given as a discrete number and unit of measurement
- A statement on whether measurements were taken from distinct samples or whether the same sample was measured repeatedly
- The statistical test(s) used AND whether they are one- or two-sided  
*Only common tests should be described solely by name; describe more complex techniques in the Methods section.*
- A description of all covariates tested
- A description of any assumptions or corrections, such as tests of normality and adjustment for multiple comparisons
- A full description of the statistical parameters including central tendency (e.g. means) or other basic estimates (e.g. regression coefficient) AND variation (e.g. standard deviation) or associated estimates of uncertainty (e.g. confidence intervals)
- For null hypothesis testing, the test statistic (e.g.  $F$ ,  $t$ ,  $r$ ) with confidence intervals, effect sizes, degrees of freedom and  $P$  value noted  
*Give  $P$  values as exact values whenever suitable.*
- For Bayesian analysis, information on the choice of priors and Markov chain Monte Carlo settings
- For hierarchical and complex designs, identification of the appropriate level for tests and full reporting of outcomes
- Estimates of effect sizes (e.g. Cohen's  $d$ , Pearson's  $r$ ), indicating how they were calculated

*Our web collection on [statistics for biologists](#) contains articles on many of the points above.*

### Software and code

Policy information about [availability of computer code](#)

Data collection

Data was collected using standard Illumina software for the NextSeq 500 and HiSeq 2500 platforms.

Data analysis

Analysis of ChIP-seq data

Adapter sequences were removed from paired end FASTQ files using cutadapt (version 1.83 – <http://cutadapt.readthedocs.io/en/stable/>), before aligning to the sacc3 genome using BWA (version 0.7.15-r114065). For analysis of epl1(1-485) data, reads of chrXII were removed from all data sets, as this chromosome appeared to be unstable in this mutant (1.5x coverage). Coverage tracks represent reads per genome coverage, calculated using the Java Genomics Toolkit version 1 (<https://github.com/timpalpant/java-genomics-toolkit>) scripts, ngs.BaseAlignCounts and wigmath.Scale. Log2 transformed ChIP over input tracks were calculated using the Java Genomics Toolkit and regions without signal in the input were removed to avoid division by 0. Replicates were pooled for subsequent analysis, and figures were generated in R.

Similar to other groups<sup>26,27</sup>, ChIP-seq datasets from 1,10-pt-treated or Epl1(1-485) cells were normalized to silent regions. The genome was divided into 250 bp bins, bins outside the interquartile range for coverage in the input were discarded, the 100 regions with the lowest Rpb3 signal were defined as silent regions, and these silent regions were used to normalized ChIP-seq datasets for cross-condition comparisons (Supplementary Table 3). We also added synthetic DNA spike-ins to our ChIP eluates and inputs (Supplementary Table 4), but this approach to normalization did not work well for all samples, possibly due to low coverage of the spike-ins in some samples.

Publicly available datasets

Publicly available datasets used in this paper are listed in Supplementary Table 5. FASTQ files from Weiner et al., 2015 were mapped to the sacc3 genome using BWA version 0.7.15-r114065. Reads were extended to 146 bp, and reads per genome coverage and log2 transformed ChIP over input files were calculated using deepTools version 3.0266.

Defining genome annotations

Yeast transcription start and end sites were downloaded from the supplemental files of Chereji et al., 2018<sup>67</sup>. To identify active, non-

divergent, yeast promoters, genes in the lowest quintile of NET-seq signal over the first 500 bp downstream of the TSS were designated as non-transcribed. Unidirectional promoters were then defined as transcribed genes with the lowest quintile of NET-seq signal 100-600 bp upstream of the TSS (832 genes). RefSeq mm9 TSSs were downloaded from the UCSC Genome Browser (<https://genome.ucsc.edu/>). To identify mouse genes with active, non-divergent, promoters, transcribed genes were defined as those with greater than the median PRO-seq signal over 1 kb downstream of the TSS, and transcribed genes in the lowest quintile of PRO-seq signal upstream of the TSS were designated as having unidirectional promoters (3035 genes).

For transcribed nucleosomes classified by Rpb3 change upon 1,10-pt treatment (Supplementary Figures 3B and 5B), genome-wide nucleosome positions with Rpb3 signal greater than the median were classified as transcribed. Nucleosomes where Rpb3 changed by less than 10% were classified as "Rpb3 stable", while those decreasing by at least 3x were classified as "Rpb3 lost". Boxplots represent the 1st to 3rd quartiles, with whiskers extending to 1.5 times the interquartile range or to the extreme of the data. Notches are equal to  $\pm 1/58 \text{ IQR} / \sqrt{n}$ , giving an approximation of the 95% confidence interval for the difference in 2 medians.

To find promoter peaks of Epl1, the Epl1 MNase ChIP-seq was compared to its input within the NDR for each gene<sup>67</sup>. Within each NDR, a smoothing spline was fit to the IP minus input signal (RPGC) and the peak position was selected. Peak positions with an IP minus input greater than 0.5 RPGC in the Epl1 ChIP-seq but not in the untagged control were selected as Epl1 peaks. NDRs in close proximity to tRNA genes or centromeres were removed from further analysis due to binding of Epl1 to these elements.

For motif analysis, Epl1 peaks were compared to 1958 NDR regions depleted for Epl1 binding (maximum IP minus input less than 0.1 RPGC). The 500 bp regions around peak centers were then input into the MEME-ChIP Differential Enrichment algorithm (<https://www.nature.com/articles/nprot.2014.083?draft=collection>) to find enriched motifs from the JASPAR non-redundant core fungi motifs (<https://academic.oup.com/nar/article/46/D1/D260/4621338>). For the top two hits, Rap1 and Aft2, CentriMo (<https://academic.oup.com/nar/article/40/17/e128/2411117>) was used to plot the distance from the best motif site to the Epl1 peak center and the motif probabilities around the best motif site for the regions containing target motifs.

#### Generating heatmaps and metaplots

Metaplot matrices centred on TSSs were generated using the sitepro script from the CEAS package 1.0.268 and matrices aligned to other features were produced using the visualization.MatrixAligner script from the Java Genomics Toolkit. Heatmap matrices were generated using deepTools<sup>69</sup>. Metaplots and heatmaps were generated using baseR and ComplexHeatmap version 1.2070 respectively. For 2D heatmaps, plot2DO (version 1) was used<sup>71</sup>

For manuscripts utilizing custom algorithms or software that are central to the research but not yet described in published literature, software must be made available to editors/reviewers. We strongly encourage code deposition in a community repository (e.g. GitHub). See the Nature Research [guidelines for submitting code & software](#) for further information.

## Data

Policy information about [availability of data](#)

All manuscripts must include a [data availability statement](#). This statement should provide the following information, where applicable:

- Accession codes, unique identifiers, or web links for publicly available datasets
- A list of figures that have associated raw data
- A description of any restrictions on data availability

Data generated for this manuscript were deposited in the NCBI Gene Expression Omnibus under the accession code GSE110287 [<https://www.ncbi.nlm.nih.gov/geo/query/acc.cgi?acc=GSE110287>]. Published datasets analyzed for this manuscript are detailed in Supplementary Table 5. Source data for Figures 1a and 1d, and Epl1 peak midpoints are provided in the Source Data file.

## Field-specific reporting

Please select the one below that is the best fit for your research. If you are not sure, read the appropriate sections before making your selection.

Life sciences     Behavioural & social sciences     Ecological, evolutionary & environmental sciences

For a reference copy of the document with all sections, see [nature.com/documents/nr-reporting-summary-flat.pdf](https://www.nature.com/documents/nr-reporting-summary-flat.pdf)

## Life sciences study design

All studies must disclose on these points even when the disclosure is negative.

|                 |                                                                                                                                                                                                                     |
|-----------------|---------------------------------------------------------------------------------------------------------------------------------------------------------------------------------------------------------------------|
| Sample size     | Sample sizes for immunoblots were determined by the maximum number of samples that could be run on a single blot. Sample sizes for ChIP-seq experiments was limited to two replicates due to financial constraints. |
| Data exclusions | For analysis of epl1(1-485) data reads of chrXII were removed from all data sets as this chromosome appeared to be unstable in this mutant (1.5x coverage).                                                         |
| Replication     | The reproducibility for all sequencing data and analyses was confirmed by two independent experiments.                                                                                                              |
| Randomization   | All experiments were performed with large numbers of isogenic cells and thus randomization was not required.                                                                                                        |
| Blinding        | Blinding was not required because the data analysis pipelines used prevent human bias.                                                                                                                              |

# Reporting for specific materials, systems and methods

We require information from authors about some types of materials, experimental systems and methods used in many studies. Here, indicate whether each material, system or method listed is relevant to your study. If you are not sure if a list item applies to your research, read the appropriate section before selecting a response.

## Materials & experimental systems

| n/a                                 | Involvement                         | Material/System             |
|-------------------------------------|-------------------------------------|-----------------------------|
| <input type="checkbox"/>            | <input checked="" type="checkbox"/> | Antibodies                  |
| <input type="checkbox"/>            | <input checked="" type="checkbox"/> | Eukaryotic cell lines       |
| <input checked="" type="checkbox"/> | <input type="checkbox"/>            | Palaeontology               |
| <input checked="" type="checkbox"/> | <input type="checkbox"/>            | Animals and other organisms |
| <input checked="" type="checkbox"/> | <input type="checkbox"/>            | Human research participants |
| <input checked="" type="checkbox"/> | <input type="checkbox"/>            | Clinical data               |

## Methods

| n/a                                 | Involvement                         | Method                 |
|-------------------------------------|-------------------------------------|------------------------|
| <input type="checkbox"/>            | <input checked="" type="checkbox"/> | ChIP-seq               |
| <input checked="" type="checkbox"/> | <input type="checkbox"/>            | Flow cytometry         |
| <input checked="" type="checkbox"/> | <input type="checkbox"/>            | MRI-based neuroimaging |

## Antibodies

### Antibodies used

Note: histones H3 and H4 are extremely well conserved between yeast and humans. Indeed all PTM sites analyzed in this manuscript are identical between yeast and human histones. The C-terminus of H3 is divergent between yeast and human and thus we generated a custom yeast-specific antibody for this site.

anti-H3K4me3 rabbit antibody (Abcam ab1012, lot #1276040)  
 anti-H3K9ac rabbit antibody custom antibody (Kimura et al., 2008, CMA305)  
 anti-H3K14ac custom rabbit antibody (GeneScript, affinity-purified)  
 anti-H3K18ac rabbit antibody (Abcam ab1191)  
 anti-H3K23ac rabbit antibody (Active Motif 39131, lot # 1008001)  
 anti-H3K27ac rabbit antibody (Active Motif 39133)  
 anti-H3K36ac rabbit antibody (Abcam ab177179, lot # GR205508)  
 anti-H3K56ac rabbit antibody (Abcam ab76307, lot # EPR996Y)  
 anti-H3K122ac rabbit antibody (Abcam ab33309, lot # GR3306851)  
 anti-H4K5ac rabbit antibody (Millipore 07-327, lot # 2524676)  
 anti-H4K8ac rabbit antibody (Abcam ab45166, clone # EP1002Y)  
 anti-H4K12ac rabbit antibody (Active Motif 39165, lot # 1008001)  
 anti-H4K16ac rabbit antibody (Millipore 07-329, lot # 2506422)  
 anti-H3 custom rabbit antibody (GeneScript, raised against CKDILARRLRGERS)  
 anti-H4 mouse antibody (Abcam ab31830, myeloma: Sp2/O-Ag14)  
 anti-HA rat antibody (Roche 12CA5, lot # 11849700)  
 anti-Rpb1 ser5p mouse antibody (3e8, Millipore 04-1572, lot # 2585825)

### Validation

anti-H3K4me3: immunoblot signal specifically disrupted by H3K4me3 peptides and not H3K4me2, me1, or me0 peptides.  
 anti-H3K9ac: immunoblot signal reduced greater than 80% in gcn5 deletion  
 anti-H3K14ac: immunoblot signal reduced greater than 90% in ada2sas3 deletion  
 anti-H3K18ac: immunoblot signal reduced greater than 90% in gcn5 deletion  
 anti-H3K23ac: immunoblot signal reduced greater than 95% in H3K23R mutant  
 anti-H3K56ac: immunoblot signal reduced greater than 90% in rtt109 mutant  
 anti-H3K122ac: immunoblot signal at expected size observed in WCEs.  
 anti-H4K5ac: immunoblot signal reduced greater than 90% in esa1-ts strain grown at 37 degrees C  
 anti-H4K8ac: immunoblot signal reduced greater than 90% in esa1-ts strain grown at 37 degrees C  
 anti-H4K12ac: immunoblot signal reduced greater than 90% in esa1-ts strain grown at 37 degrees C  
 anti-H4K16ac: immunoblot signal at expected size observed in WCEs.  
 anti-H3: immunoblot signal at expected size observed in WCEs and using recombinant expressed histone H3.  
 anti-H4: immunoblot signal at expected size observed in WCEs and using recombinant expressed histone H4.  
 anti-HA: immunoblot, ChIP-qPCR, and ChIP-seq confirmed specific reactivity to strains with HA-tagged proteins and little to no reactivity to untagged strains.  
 anti-Rpb1 ser5p: immunoblot signal at expected size

## Eukaryotic cell lines

Policy information about [cell lines](#)

### Cell line source(s)

All yeast strains used in this study are listed in Supplementary Table 1. The mESC line used is described in Chen et al., 2018 (PMID: 29229671) and was derived from TT2 cells. TT2 cells were established from an F1 embryo between a C57BL/6 female and a CBA male as F1/1 cells by Suda et al., 1987 (PMID: 2832150).

|                                                                      |                                                                                                                                                                                   |
|----------------------------------------------------------------------|-----------------------------------------------------------------------------------------------------------------------------------------------------------------------------------|
| Authentication                                                       | All yeast strains were verified by PCR of genomic DNA. For the strains expressing tagged proteins, the strains were verified first by PCR of genomic DNA and immunoblot analysis. |
| Mycoplasma contamination                                             | All cell lines tested are free for mycoplasma contamination.                                                                                                                      |
| Commonly misidentified lines<br>(See <a href="#">ICLAC</a> register) | No commonly misidentified cell lines were used in the study.                                                                                                                      |

## ChIP-seq

### Data deposition

- Confirm that both raw and final processed data have been deposited in a public database such as [GEO](#).
- Confirm that you have deposited or provided access to graph files (e.g. BED files) for the called peaks.

### Data access links

*May remain private before publication.*

<https://www.ncbi.nlm.nih.gov/geo/query/acc.cgi?acc=GSE110287>

### Files in database submission

GSM2985387\_pt15\_rep1\_input\_coverage\_per\_mil\_frag.wig  
 GSM2985388\_tp0\_rep1\_H4K12ac\_coverage\_per\_mil\_frag.wig  
 GSM2985389\_pt15\_rep1\_H4K12ac\_coverage\_per\_mil\_frag.wig  
 GSM2985390\_tsa15\_rep1\_H4K12ac\_coverage\_per\_mil\_frag.wig  
 GSM2985391\_pt15\_rep1\_H3K23ac\_coverage\_per\_mil\_frag.wig  
 GSM2985392\_pt15\_rep2\_Input\_coverage\_per\_mil\_frag.wig  
 GSM2985393\_tp0\_rep2\_H4K12ac\_coverage\_per\_mil\_frag.wig  
 GSM2985394\_pt15\_rep2\_H4K12ac\_coverage\_per\_mil\_frag.wig  
 GSM2985395\_tsa15\_rep2\_H4K12ac\_coverage\_per\_mil\_frag.wig  
 GSM2985396\_pt15\_rep2\_H3K23ac\_coverage\_per\_mil\_frag.wig  
 GSM2985412\_EPL1HA6\_rep1\_tp0\_100uMNase\_H4K8ac\_coverage\_per\_mil\_frag.wig  
 GSM2985413\_EPL1HA6\_rep2\_tp0\_100uMNase\_H4K8ac\_coverage\_per\_mil\_frag.wig  
 GSM2985414\_EPL1HA6\_rep1\_tp\_pt15\_100uMNase\_H4K8ac\_coverage\_per\_mil\_frag.wig  
 GSM2985415\_EPL1HA6\_rep2\_tp\_pt15\_100uMNase\_H4K8ac\_coverage\_per\_mil\_frag.wig  
 GSM2985416\_EPL1HA6\_rep1\_tp0\_100uMNase\_Input\_coverage\_per\_mil\_frag.wig  
 GSM2985417\_EPL1HA6\_rep2\_tp0\_100uMNase\_Input\_coverage\_per\_mil\_frag.wig  
 GSM2985418\_EPL1HA6\_rep1\_tp\_pt15\_100uMNase\_Input\_coverage\_per\_mil\_frag.wig  
 GSM2985419\_EPL1HA6\_rep2\_tp\_pt15\_100uMNase\_Input\_coverage\_per\_mil\_frag.wig  
 GSM2985433\_EPL1HA6\_rep1\_tp0\_Sonicated\_HA\_IP\_coverage\_per\_mil\_frag.wig  
 GSM2985434\_EPL1HA6\_rep2\_tp0\_Sonicated\_HA\_IP\_coverage\_per\_mil\_frag.wig  
 GSM2985435\_EPL1HA6\_rep1\_tp\_pt15\_Sonicated\_HA\_IP\_coverage\_per\_mil\_frag.wig  
 GSM2985436\_EPL1HA6\_rep2\_tp\_pt15\_Sonicated\_HA\_IP\_coverage\_per\_mil\_frag.wig  
 GSM2985437\_EPL1HA6\_rep1\_tp0\_Sonicated\_Input\_coverage\_per\_mil\_frag.wig  
 GSM2985438\_EPL1HA6\_rep2\_tp0\_Sonicated\_Input\_coverage\_per\_mil\_frag.wig  
 GSM2985439\_EPL1HA6\_rep1\_tp\_pt15\_Sonicated\_Input\_coverage\_per\_mil\_frag.wig  
 GSM2985440\_EPL1HA6\_rep2\_tp\_pt15\_Sonicated\_Input\_coverage\_per\_mil\_frag.wig  
 GSM4100666\_EPL1\_rep1\_tp0\_100uMNase\_HA\_IP\_coverage\_per\_mil\_frag.wig  
 GSM4100667\_epl1.485\_rep1\_tp0\_100uMNase\_HA\_IP\_coverage\_per\_mil\_frag.wig  
 GSM4100668\_epl1.485\_rep1\_tp0\_100uMNase\_Input\_coverage\_per\_mil\_frag.wig  
 GSM4100669\_epl1.485\_6HA\_rep1\_tp0\_Sonicated\_HA\_IP\_coverage\_per\_mil\_frag.wig  
 GSM4100670\_epl1.485\_6HA\_rep1\_tp0\_Sonicated\_Input\_coverage\_per\_mil\_frag.wig  
 GSM4100671\_epl1.485\_6HA\_rep1\_tp\_pt15\_Sonicated\_HA\_IP\_coverage\_per\_mil\_frag.wig  
 GSM4100672\_epl1.485\_6HA\_rep1\_tp\_pt15\_Sonicated\_Input\_coverage\_per\_mil\_frag.wig  
 GSM4100673\_epl1.485\_6HA\_rep2\_tp0\_Sonicated\_HA\_IP\_coverage\_per\_mil\_frag.wig  
 GSM4100674\_epl1.485\_6HA\_rep2\_tp0\_Sonicated\_Input\_coverage\_per\_mil\_frag.wig  
 GSM4100675\_epl1.485\_6HA\_rep2\_tp\_pt15\_Sonicated\_HA\_IP\_coverage\_per\_mil\_frag.wig  
 GSM4100676\_epl1.485\_6HA\_rep2\_tp\_pt15\_Sonicated\_Input\_coverage\_per\_mil\_frag.wig  
 GSM4849495\_epl1.485HA6\_rep1\_tp0\_100uMNase\_H4K8ac\_coverage\_per\_mil\_frag.wig  
 GSM4849496\_epl1.485HA6\_rep2\_tp0\_100uMNase\_H4K8ac\_coverage\_per\_mil\_frag.wig  
 GSM4849497\_epl1.485HA6\_rep1\_pt15\_100uMNase\_H4K8ac\_coverage\_per\_mil\_frag.wig  
 GSM4849498\_epl1.485HA6\_rep2\_pt15\_100uMNase\_H4K8ac\_coverage\_per\_mil\_frag.wig  
 GSM4849499\_epl1.485HA6\_rep2\_tp0\_100uMNase\_Input\_coverage\_per\_mil\_frag.wig  
 GSM4849500\_epl1.485HA6\_rep1\_pt15\_100uMNase\_Input\_coverage\_per\_mil\_frag.wig  
 GSM4849501\_epl1.485HA6\_rep2\_pt15\_100uMNase\_Input\_coverage\_per\_mil\_frag.wig  
 GSM4849502\_Untagged\_100uMNase\_HA\_IP\_coverage\_per\_mil\_frag.wig  
 GSM4849503\_Untagged\_100uMNase\_Input\_coverage\_per\_mil\_frag.wig  
 GSM4850569\_tp0\_rep1\_H3K23ac\_coverage\_per\_mil\_frag.wig  
 GSM4850570\_tp0\_rep1\_Input\_coverage\_per\_mil\_frag.wig  
 GSM4850571\_tp0\_rep2\_H3K23ac\_coverage\_per\_mil\_frag.wig  
 GSM4850572\_tp0\_rep2\_Input\_coverage\_per\_mil\_frag.wig

GSM4850573\_tsa15\_rep1\_H3K23ac\_coverage\_per\_mil\_frag.wig  
GSM4850574\_tsa15\_rep1\_Input\_coverage\_per\_mil\_frag.wig  
GSM4850575\_tsa15\_rep2\_H3K23ac\_coverage\_per\_mil\_frag.wig  
GSM4850576\_tsa15\_rep2\_Input\_coverage\_per\_mil\_frag.wig  
EPL1\_rep1\_tp0\_100uMNase\_HA\_IP\_R1.fastq  
EPL1\_rep1\_tp0\_100uMNase\_HA\_IP\_R2.fastq  
ep1.485\_6HA\_rep1\_tp\_pt15\_Sonicated\_HA\_IP\_R1.fastq  
ep1.485\_6HA\_rep1\_tp\_pt15\_Sonicated\_HA\_IP\_R2.fastq  
ep1.485\_6HA\_rep1\_tp\_pt15\_Sonicated\_Input\_R1.fastq  
ep1.485\_6HA\_rep1\_tp\_pt15\_Sonicated\_Input\_R2.fastq  
ep1.485\_6HA\_rep1\_tp0\_Sonicated\_HA\_IP\_R1.fastq  
ep1.485\_6HA\_rep1\_tp0\_Sonicated\_HA\_IP\_R2.fastq  
ep1.485\_6HA\_rep1\_tp0\_Sonicated\_Input\_R1.fastq  
ep1.485\_6HA\_rep1\_tp0\_Sonicated\_Input\_R2.fastq  
ep1.485\_6HA\_rep2\_tp\_pt15\_Sonicated\_HA\_IP\_R1.fastq  
ep1.485\_6HA\_rep2\_tp\_pt15\_Sonicated\_HA\_IP\_R2.fastq  
ep1.485\_6HA\_rep2\_tp\_pt15\_Sonicated\_Input\_R1.fastq  
ep1.485\_6HA\_rep2\_tp\_pt15\_Sonicated\_Input\_R2.fastq  
ep1.485\_6HA\_rep2\_tp0\_Sonicated\_HA\_IP\_R1.fastq  
ep1.485\_6HA\_rep2\_tp0\_Sonicated\_HA\_IP\_R2.fastq  
ep1.485\_6HA\_rep2\_tp0\_Sonicated\_Input\_R1.fastq  
ep1.485\_6HA\_rep2\_tp0\_Sonicated\_Input\_R2.fastq  
ep1.485\_rep1\_tp0\_100uMNase\_HA\_IP\_R1.fastq  
ep1.485\_rep1\_tp0\_100uMNase\_HA\_IP\_R2.fastq  
ep1.485\_rep1\_tp0\_100uMNase\_Input\_R1.fastq  
ep1.485\_rep1\_tp0\_100uMNase\_Input\_R2.fastq  
ep1.485HA6\_rep1\_pt15\_100uMNase\_H4K8ac\_R1.fastq  
ep1.485HA6\_rep1\_pt15\_100uMNase\_H4K8ac\_R2.fastq  
ep1.485HA6\_rep1\_pt15\_100uMNase\_Input\_R1.fastq  
ep1.485HA6\_rep1\_pt15\_100uMNase\_Input\_R2.fastq  
ep1.485HA6\_rep1\_tp0\_100uMNase\_H4K8ac\_R1.fastq  
ep1.485HA6\_rep1\_tp0\_100uMNase\_H4K8ac\_R2.fastq  
ep1.485HA6\_rep2\_pt15\_100uMNase\_H4K8ac\_R1.fastq  
ep1.485HA6\_rep2\_pt15\_100uMNase\_H4K8ac\_R2.fastq  
ep1.485HA6\_rep2\_pt15\_100uMNase\_Input\_R1.fastq  
ep1.485HA6\_rep2\_pt15\_100uMNase\_Input\_R2.fastq  
ep1.485HA6\_rep2\_tp0\_100uMNase\_H4K8ac\_R1.fastq  
ep1.485HA6\_rep2\_tp0\_100uMNase\_H4K8ac\_R2.fastq  
ep1.485HA6\_rep2\_tp0\_100uMNase\_Input\_R1.fastq  
ep1.485HA6\_rep2\_tp0\_100uMNase\_Input\_R2.fastq  
EPL1HA6\_rep1\_tp\_pt15\_100uMNase\_H4K8ac\_R1.fastq  
EPL1HA6\_rep1\_tp\_pt15\_100uMNase\_H4K8ac\_R2.fastq  
EPL1HA6\_rep1\_tp\_pt15\_100uMNase\_Input\_R1.fastq  
EPL1HA6\_rep1\_tp\_pt15\_100uMNase\_Input\_R2.fastq  
EPL1HA6\_rep1\_tp\_pt15\_Sonicated\_HA\_IP\_R1.fastq  
EPL1HA6\_rep1\_tp\_pt15\_Sonicated\_HA\_IP\_R2.fastq  
EPL1HA6\_rep1\_tp\_pt15\_Sonicated\_Input\_R1.fastq  
EPL1HA6\_rep1\_tp\_pt15\_Sonicated\_Input\_R2.fastq  
EPL1HA6\_rep1\_tp0\_100uMNase\_H4K8ac\_R1.fastq  
EPL1HA6\_rep1\_tp0\_100uMNase\_H4K8ac\_R2.fastq  
EPL1HA6\_rep1\_tp0\_100uMNase\_Input\_R1.fastq  
EPL1HA6\_rep1\_tp0\_100uMNase\_Input\_R2.fastq  
EPL1HA6\_rep1\_tp0\_Sonicated\_HA\_IP\_R1.fastq  
EPL1HA6\_rep1\_tp0\_Sonicated\_HA\_IP\_R2.fastq  
EPL1HA6\_rep1\_tp0\_Sonicated\_Input\_R1.fastq  
EPL1HA6\_rep1\_tp0\_Sonicated\_Input\_R2.fastq  
EPL1HA6\_rep2\_tp\_pt15\_100uMNase\_H4K8ac\_R1.fastq  
EPL1HA6\_rep2\_tp\_pt15\_100uMNase\_H4K8ac\_R2.fastq  
EPL1HA6\_rep2\_tp\_pt15\_100uMNase\_Input\_R1.fastq  
EPL1HA6\_rep2\_tp\_pt15\_100uMNase\_Input\_R2.fastq  
EPL1HA6\_rep2\_tp\_pt15\_Sonicated\_HA\_IP\_R1.fastq  
EPL1HA6\_rep2\_tp\_pt15\_Sonicated\_HA\_IP\_R2.fastq  
EPL1HA6\_rep2\_tp\_pt15\_Sonicated\_Input\_R1.fastq  
EPL1HA6\_rep2\_tp\_pt15\_Sonicated\_Input\_R2.fastq  
EPL1HA6\_rep2\_tp0\_100uMNase\_H4K8ac\_R1.fastq  
EPL1HA6\_rep2\_tp0\_100uMNase\_H4K8ac\_R2.fastq  
EPL1HA6\_rep2\_tp0\_100uMNase\_Input\_R1.fastq  
EPL1HA6\_rep2\_tp0\_100uMNase\_Input\_R2.fastq

EPL1HA6\_rep2\_tp0\_Sonicated\_HA\_IP\_R1.fastq  
 EPL1HA6\_rep2\_tp0\_Sonicated\_HA\_IP\_R2.fastq  
 EPL1HA6\_rep2\_tp0\_Sonicated\_Input\_R1.fastq  
 EPL1HA6\_rep2\_tp0\_Sonicated\_Input\_R2.fastq  
 pt15\_rep1\_H3K23ac\_R1.fastq  
 pt15\_rep1\_H3K23ac\_R2.fastq  
 pt15\_rep1\_H4K12ac\_R1.fastq  
 pt15\_rep1\_H4K12ac\_R2.fastq  
 pt15\_rep1\_input\_R1.fastq  
 pt15\_rep1\_input\_R2.fastq  
 pt15\_rep2\_H3K23ac\_R1.fastq  
 pt15\_rep2\_H3K23ac\_R2.fastq  
 pt15\_rep2\_H4K12ac\_R1.fastq  
 pt15\_rep2\_H4K12ac\_R2.fastq  
 pt15\_rep2\_Input\_R1.fastq  
 pt15\_rep2\_Input\_R2.fastq  
 tp0\_rep1\_H4K12ac\_R1.fastq  
 tp0\_rep1\_H4K12ac\_R2.fastq  
 tp0\_rep2\_H4K12ac\_R1.fastq  
 tp0\_rep2\_H4K12ac\_R2.fastq  
 tsa15\_rep1\_H4K12ac\_R1.fastq  
 tsa15\_rep1\_H4K12ac\_R2.fastq  
 tsa15\_rep2\_H4K12ac\_R1.fastq  
 tsa15\_rep2\_H4K12ac\_R2.fastq  
 Untagged\_100uMNase\_HA\_IP\_R1.fastq  
 Untagged\_100uMNase\_HA\_IP\_R2.fastq  
 Untagged\_100uMNase\_Input\_R1.fastq  
 Untagged\_100uMNase\_Input\_R2.fastq

Genome browser session  
 (e.g. [UCSC](#))

Please refer to wig files at <https://www.ncbi.nlm.nih.gov/geo/query/acc.cgi?acc=GSE110287>

## Methodology

Replicates

Duplicate biological replicates were performed for each condition, except for the MNase Epl1 and Epl1(1-485) ChIP-seq experiments. For these, only one replicate was performed, but good agreement with the sonicated ChIP-seq data was used to validate these data

Sequencing depth

Sample, Mapped Reads, Uniquely Mapped Reads  
 EPL1-6HA\_MNase\_HA\_IP\_tp0, 13662338, 12318028  
 epl1.485-6HA\_MNase\_HA\_IP\_tp0, 18180146, 16784518  
 EPL1-6HA\_Sonic\_HA\_IP\_pt15\_rep1, 7766190, 7529484  
 EPL1-6HA\_Sonic\_HA\_IP\_pt15\_rep2, 4156226, 4084592  
 EPL1-6HA\_Sonic\_HA\_IP\_tp0\_rep1, 4652560, 4567586  
 EPL1-6HA\_Sonic\_HA\_IP\_tp0\_rep2, 9314654, 9035532  
 epl1.485-6HA\_Sonic\_HA\_IP\_pt15\_rep1, 3710104, 3658112  
 epl1.485-6HA\_Sonic\_HA\_IP\_pt15\_rep2, 3249480, 3198912  
 epl1.485-6HA\_Sonic\_HA\_IP\_tp0\_rep1, 4777056, 4691198  
 epl1.485-6HA\_Sonic\_HA\_IP\_tp0\_rep2, 3165104, 3126848  
 Untagged\_Sonic\_HA\_IP\_tp0, 7342588, 6915818  
 H3K23ac\_pt15\_rep1, 5085478, 4928616  
 H3K23ac\_pt15\_rep2, 19940100, 19058578  
 H3K23ac\_tp0\_rep1, 18627464, 17938562  
 H3K23ac\_tp0\_rep2, 16525690, 15952832  
 H3K23ac\_tsa15\_rep1, 18677944, 18037672  
 H3K23ac\_tsa15\_rep2, 15002682, 14578530  
 H4K12ac\_pt15\_rep1, 15903400, 15436774  
 H4K12ac\_pt15\_rep2, 18761686, 18219906  
 H4K12ac\_tp0\_rep1, 16730100, 16256180  
 H4K12ac\_tp0\_rep2, 14442902, 13939340  
 H4K12ac\_tsa15\_rep1, 18485180, 17820332  
 H4K12ac\_tsa15\_rep2, 15710962, 15219514  
 EPL1-6HA\_MNase\_H4K8ac\_IP\_pt15\_rep1, 17754046, 16922200  
 EPL1-6HA\_MNase\_H4K8ac\_IP\_pt15\_rep2, 19216428, 18133552  
 EPL1-6HA\_MNase\_H4K8ac\_IP\_tp0\_rep1, 9262270, 8953380  
 EPL1-6HA\_MNase\_H4K8ac\_IP\_tp0\_rep2, 19195174, 17846466  
 EPL1-6HA\_MNase\_Input\_pt15\_rep1, 6508738, 6327076  
 EPL1-6HA\_MNase\_Input\_pt15\_rep2, 10003528, 9647302  
 EPL1-6HA\_MNase\_Input\_tp0\_rep1, 8025918, 7709658

EPL1-6HA\_MNase\_Input\_tp0\_rep2, 11124518, 10679732  
 epl1.485-6HA\_MNase\_Input\_tp0\_rep1, 14416746, 13611786  
 MNase\_Input\_pt15\_rep1, 16712192, 16211722  
 MNase\_Input\_pt15\_rep2, 13464310, 13050912  
 MNase\_Input\_tp0\_rep1, 15950112, 15478082  
 MNase\_Input\_tp0\_rep2, 15947712, 15368312  
 MNase\_Input\_tsa15\_rep1, 16864558, 16303470  
 MNase\_Input\_tsa15\_rep2, 12664092, 12313610  
 epl1.485\_rep1\_tp0\_100uMNase\_Input, 16328652, 14180352  
 epl1.485\_rep2\_tp0\_100uMNase\_Input, 12019562, 10844740  
 epl1.485\_6HA\_rep1\_tp0\_H4K8ac, 17873716, 15970700  
 epl1.485\_6HA\_rep2\_tp0\_H4K8ac, 15830726, 14192766  
 epl1.485\_6HA\_rep1\_tp\_pt15\_Input, 9149494, 8612328  
 epl1.485\_6HA\_rep2\_tp\_pt15\_Input, 9361728, 8792122  
 epl1.485\_6HA\_rep1\_tp\_pt15\_H4K8ac, 11424234, 10737326  
 epl1.485\_6HA\_rep2\_tp\_pt15\_H4K8ac, 8608200, 8199060  
 101\_rep1\_tp0\_100uMNase\_Input, 10774056, 8489350  
 101\_rep1\_tp0\_100uMNase\_HA\_IP, 8962918, 8384804  
 EPL1HA6\_rep1\_tp0\_Sonicated\_Input, 1051626, 1041370  
 EPL1HA6\_rep2\_tp0\_Sonicated\_Input, 1456172, 1440200  
 EPL1HA6\_rep1\_tp\_pt15\_Sonicated\_Input, 777036, 769204  
 EPL1HA6\_rep2\_tp\_pt15\_Sonicated\_Input, 753772, 747570  
 epl1.485\_6HA\_rep1\_tp0\_Sonicated\_Input, 851202, 842922  
 epl1.485\_6HA\_rep2\_tp0\_Sonicated\_Input, 910876, 902262  
 epl1.485\_6HA\_rep1\_pt15\_Sonicated\_Input, 937222, 928178  
 epl1.485\_6HA\_rep2\_pt15\_Sonicated\_Input, 1191712, 1180420

## Antibodies

Anti-H3K23ac (Active Motif, 39131, lot # 1008001), anti-H4K8ac (Abcam, ab45166, clone # EP1002Y), anti-H4K12ac (Active Motif, 39165, lot # 1008001), anti-HA (Roche, 12CA5, lot # 11849700),

## Peak calling parameters

No peak calling algorithms were used.

## Data quality

High correspondence between replicates was confirmed by genome-wide correlation analysis.

## Software

Data was collected using standard Illumina software for the NextSeq 500 and HiSeq 2500 platforms.
